# Supplementary material
Source: PubMed Central journal article supplement (PMC4054367)
Supplement: JVI.03364-13_zjv999099123so1.pdf [file JVI.03364-13_zjv999099123so1.pdf]

## Supplemental material: Figures

**Figure S1. Monocyte/macrophage and neutrophil associated genes and pathways in feet of CHIKV infected *CCR2*<sup>-/-</sup> and WT mice.**

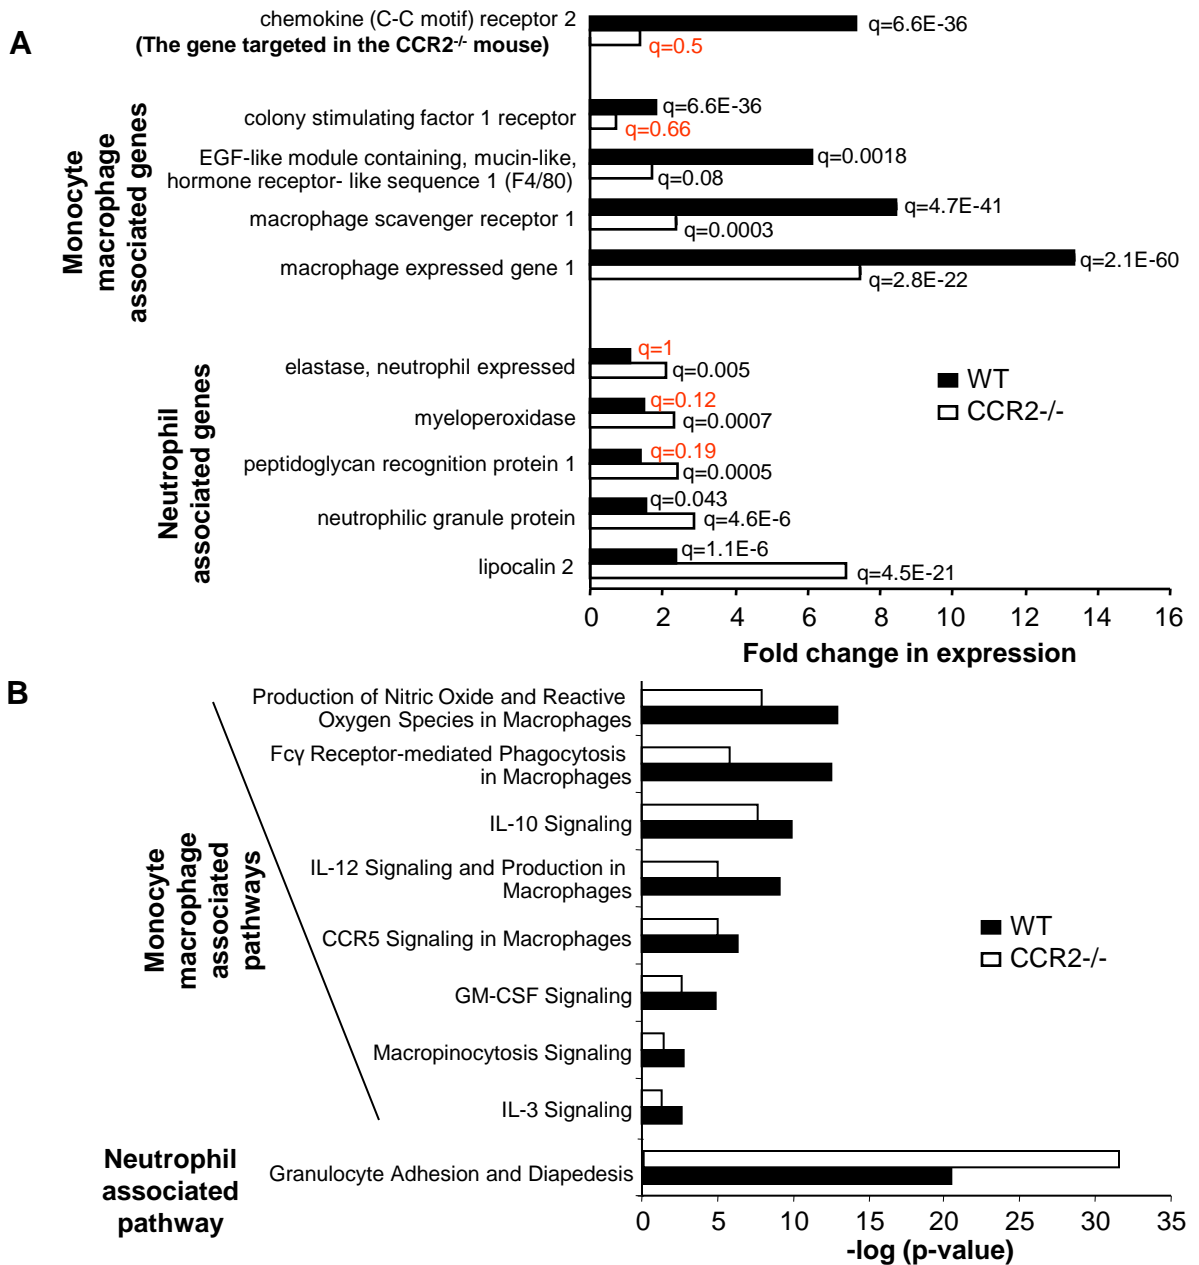

(A) Fold change in expression of up-regulated genes associated with monocyte/macrophage or neutrophils. Fold changes for DEGs from *CCR2*<sup>-/-</sup> d0 vs d7, and WT d0 vs d7 are shown with their q significance values (red values - not significant). The gene expression pattern is consistent with the histology and immunohistochemistry findings; neutrophil infiltrates predominate in arthritic feet of *CCR2*<sup>-/-</sup> mice and monocyte/macrophage infiltrates predominate in arthritic feet of WT mice.

(B) Ingenuity canonical pathway analysis of up-regulated DEGs from *CCR2*<sup>-/-</sup> d0 vs d7, and WT d0 vs d7. Monocyte/macrophage associated pathways and a neutrophil-associated pathway (Granulocyte Adhesion and Diapedesis) are shown. (IPA has relatively few pathways dedicated to neutrophils). These results are again consistent with histology and immunohistochemistry findings.

**Figure S2. Interferon-associated gene expression in feet of CHIKV infected CCR2<sup>-/-</sup> and WT mice**

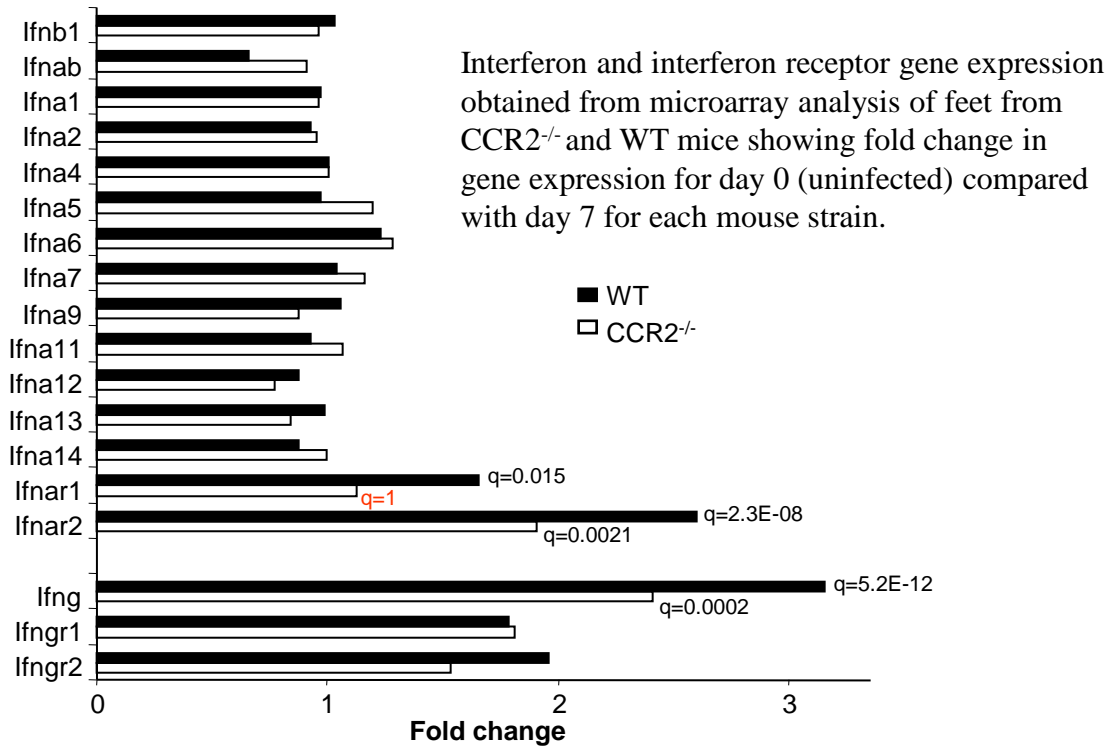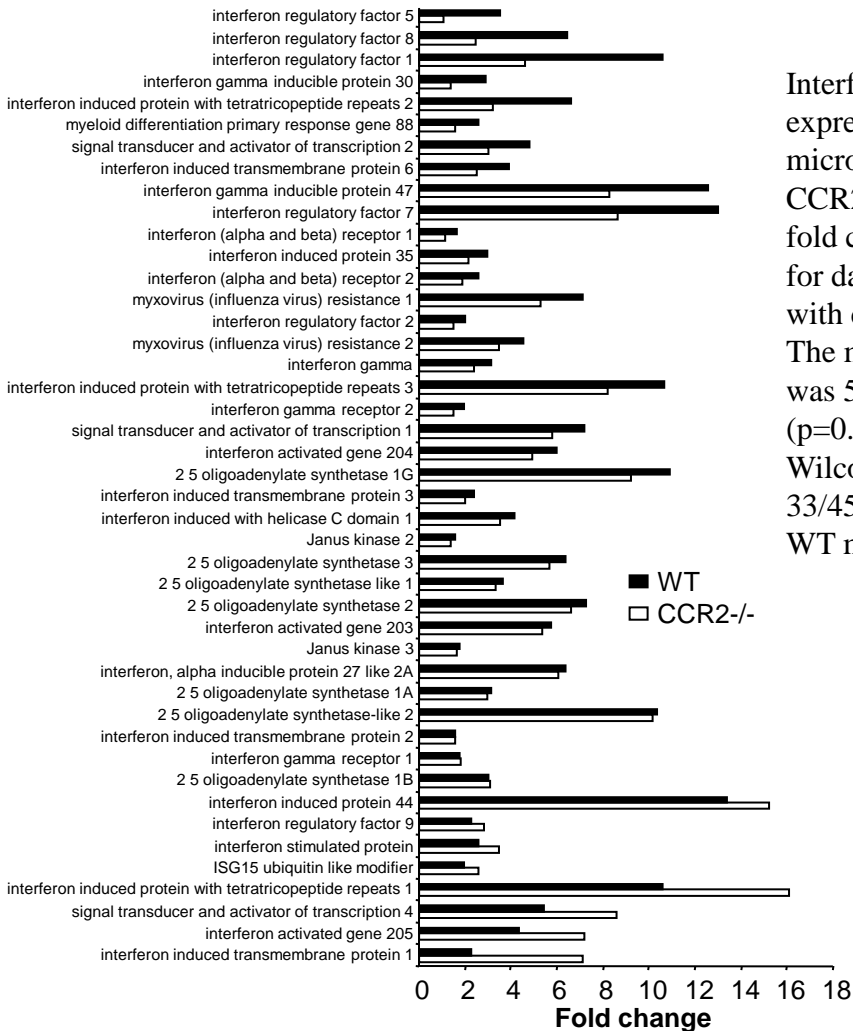

**Figure S3. Expression of genes associated with M2 and resolving macrophages in feet of CHIKV infected CCR2<sup>-/-</sup> and WT mice**

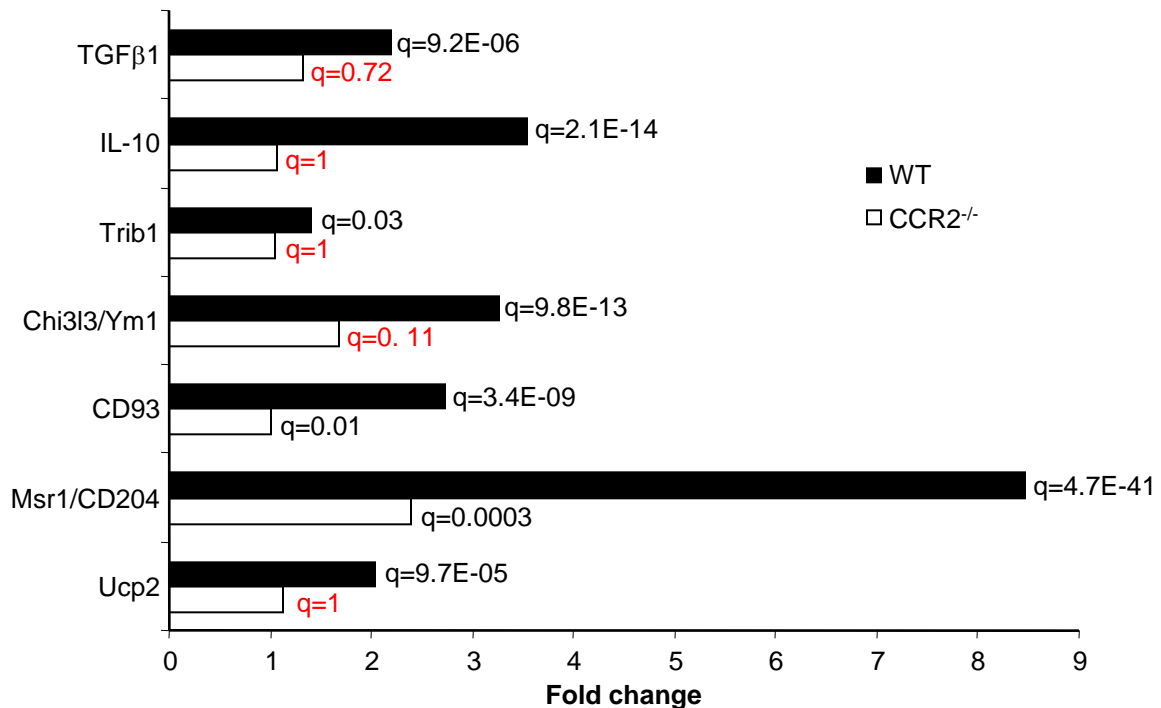

Microarray expression data (with significance q values) for genes associated with M2 and resolving macrophages (for both strains of mice, day 7 versus day 0); TGFβ1, IL-10 (Ariel and Serhan. 2012. Front Immunol 3:4), Trib1 (Sato et al., 2013. Nature. 495(7442):524-8), Ym1 (Stoermer et al., 2012. J Immunol 189:4047-59), CD93 (Beyer et al., 2012. PLoS One. 2012;7(9):e45466), Msr1 (London et al., 2013. J Immunol. 190(7):3570-8), Usp2 (Park et al., 2011. Nature. 477:220-4). Ucp2 is up-regulated during efferocytosis (*ibid*) and was up-regulated in WT mice, but not in CCR2<sup>-/-</sup> mice, despite the abundance of apoptotic cells (Figure 3C), many of which were neutrophils (Figure 2M). (Red q values - not significant)

## Supplemental material; Tables

**Table S1. Primers used for qRT PCR**

| Gene                         | Sequences (5' to 3')                                               | References                                              |
|------------------------------|--------------------------------------------------------------------|---------------------------------------------------------|
| Arg-1                        | Forward: TGGACCTGGCCTTTGTTGA<br>Reverse: GGTTGTCAGGGGAGTGTT        | Wongtrakool et al., 2012.<br>Pediatr Res 72: 147-53     |
| CHIKV-E1                     | Forward: AGCTCCGCGTCCTTTACC<br>Reverse: CAAATTGTCCTGGTCTTCCTG      | Designed in house                                       |
| CXCL1                        | Forward: TGTCAGTGCCTGCAGACCAT<br>Reverse: CCTCGCGACCATTCTTGAGT     | Feng et al., 2006. J Immunol<br>177: 7086-93            |
| CXCL2                        | Forward: GTGAAC TGCGCTGTCAATGC<br>Reverse: CGCCCTTGAGAGTGGCTATG    | <i>Ibid</i>                                             |
| G-CSF                        | Forward: CTCAACTTTCTGCCAGAGG<br>Reverse: AGCTGGCTTAGGCACTGTGT      | Waight et al., 2011. PLoS<br>One 6: e27690              |
| IL-10                        | Forward: ACAGGAGAAGGGACGCCAT<br>Reverse: GAAGCCCTACAGACGAGCTCA     | Ellet et al., 2010. J Immunol<br>184: 5849-58           |
| IL-1 $\beta$                 | Forward: TCACAGCAGCACATCAACAAG<br>Reverse: CCAGCAGGTTATCATCATCATCC | Bakker et al., 2008.<br>Cardiovasc Res 78: 341-8        |
| T-bet <sup>a</sup>           | Forward: ACCAGAGCGGCAAGTGGG<br>Reverse: TGGACATATAAGCGGTTCCCTG     | Carlson et al., 2009. Blood<br>113: 1365-74             |
| ROR- $\gamma$ T <sup>b</sup> | Forward: CCGCTGAGAGGGCTTCAC<br>Reverse: TGCAGGAGTAGGCCACATTACA     | <i>Ibid</i>                                             |
| RPL13A                       | Forward: GAGGTCGGGTGGAAGTACCA<br>Reverse: GCAT CTTGGCCTTTTCCTT     | Mogal and Abdulkadir, 2006.<br>Mol Cell Probes 20: 81-6 |

Sequences of primers used in the qRT-PCR experiments. <sup>a</sup>T-bet is a transcription factor expressed by Th1 cells. <sup>b</sup>ROR- $\gamma$ T is a transcription factor expressed by Th17 cell.

**Table S2. Fold changes in chemokine and chemokine receptors in feet of CHIKV infected CCR2<sup>-/-</sup> and WT mice.**

| Gene Symbol                        | CCR2 <sup>-/-</sup> fold change | q value  | WT fold change | q value  | Ratio fold change CCR2 <sup>-/-</sup> / WT |
|------------------------------------|---------------------------------|----------|----------------|----------|--------------------------------------------|
| Cxcl2 <sup>a</sup>                 | 7.1                             | 4.45E-21 | 1.4            | 0.306    | 5.205                                      |
| Cxcl5 <sup>a</sup>                 | 7.8                             | 2.25E-23 | 1.6            | 0.048    | 5.028                                      |
| Cxcr2 <sup>b</sup>                 | 6.3                             | 9.55E-19 | 1.3            | 0.336    | 4.691                                      |
| Cxcl13                             | 6.6                             | 1.35E-19 | 2.3            | 2.86E-06 | 2.888                                      |
| Ccr12                              | 3.7                             | 1.76E-09 | 1.8            | 0.005    | 2.114                                      |
| Ccl20                              | 2.1                             | 0.003    | 1.0            | 1.002    | 2.099                                      |
| Ccl3/MIP-1 $\alpha$ <sup>a,b</sup> | 13.5                            | 2.41E-37 | 7.5            | 1.18E-36 | 1.803                                      |
| Cxcr6                              | 6.5                             | 1.88E-19 | 3.7            | 2.35E-15 | 1.778                                      |
| Ccr3                               | 2.0                             | 0.008    | 1.2            | 0.870    | 1.717                                      |
| Ccl19                              | 3.7                             | 1.76E-09 | 2.2            | 7.26E-06 | 1.670                                      |
| Cxcl16                             | 1.8                             | 0.037    | 2.8            | 1.91E-09 | 0.660                                      |
| Cxcr4                              | 1.8                             | 0.0661   | 2.8            | 2.54E-09 | 0.637                                      |
| Ccl7 <sup>c</sup>                  | 8.3                             | 9.48E-25 | 16.4           | 1.79E-70 | 0.507                                      |
| Ccl12 <sup>c</sup>                 | 1.7                             | 0.091    | 3.4            | 1.76E-13 | 0.503                                      |
| Ccr5 <sup>c</sup>                  | 3.8                             | 1.11E-09 | 18.9           | 1.33E-77 | 0.199                                      |
| <b>Ccr2</b>                        | 1.4                             | 0.518    | 7.4            | 6.66E-36 | 0.191                                      |

Many chemokine and chemokine receptors were more up (red numbers) or more down (blue numbers) regulated in CCR2<sup>-/-</sup> mice compared with WT mice day 7 post infection; (only DEGS where differences between WT and/or CCR2<sup>-/-</sup> were >1.5 are shown). CCR2 (indicated in yellow) is the target of the knock out in CCR2<sup>-/-</sup> mice and is up-regulated in WT mice, whereas (as expected) expression is not significant (q=0.518) in CCR2<sup>-/-</sup> mice.

Chemokine and chemokine receptor expression levels reflect the increased neutrophil and reduced monocyte/macrophage infiltrates seen in arthritic feet of CCR2<sup>-/-</sup> mice compared with WT mice: <sup>a</sup> recruit neutrophils; <sup>b</sup> expressed by neutrophils (Soehnlein and Lindbom, 2010. Nat Rev Immunol. 10(6):427-39; Sadik et al., 2011. Trends Immunol 32(10);452-460); <sup>c</sup> highly expressed in inflammatory macrophages (<http://www.immgen.org/databrowser/index.html>).

**Table S3. Details of the IPA pathways shown in Fig 6A (top graph).**

| <b>Ingenuity Canonical Pathways</b>                                            | <b>-log(p value)</b> | <b>Molecules</b>                                                        |
|--------------------------------------------------------------------------------|----------------------|-------------------------------------------------------------------------|
| <b>Granulocyte</b>                                                             |                      |                                                                         |
| Granulocyte Adhesion and Diapedesis                                            | 7.52                 | CXCL3,IL36G,MMP3,CXCL13,CXCR2,PPBP,CCL3L1/CCL3L3,CCL20,IL1B,CXCL6,CCL19 |
| Agranulocyte Adhesion and Diapedesis <sup>a</sup>                              | 7.27                 | CXCL3,IL36G,MMP3,CXCL13,CXCR2,PPBP,CCL3L1/CCL3L3,CCL20,IL1B,CXCL6,CCL19 |
| <b>IL-17A in autoimmunity</b>                                                  |                      |                                                                         |
| Role of IL-17A in Psoriasis                                                    | 7.78                 | CXCL3,S100A9,CCL20,S100A8,CXCL6                                         |
| Role of IL-17A in Arthritis                                                    | 4.41                 | CXCL3,CCL20,PTGS2,NOS2,CXCL6                                            |
| <b>Rheumatoid arthritis</b>                                                    |                      |                                                                         |
| Altered T Cell and B Cell Signaling in Rheumatoid Arthritis                    | 2.55                 | IL36G,CXCL13,LTB,IL1B                                                   |
| Role of Osteoblasts, Osteoclasts and Chondrocytes in Rheumatoid Arthritis      | 1.73                 | IL36G,SFRP2,MMP3,IL1B,Bmpr1b                                            |
| Role of Macrophages, Fibroblasts and Endothelial Cells in Rheumatoid Arthritis | 1.71                 | IL36G,SFRP2,MMP3,LTB,IL1B,NOS2                                          |
| <b>Inflammation</b>                                                            |                      |                                                                         |
| Acute Phase Response Signaling                                                 | 3.77                 | IL36G,HP,C1S,RBP2,IL1B,SERPINA3,OSMR                                    |
| Communication between Innate and Adaptive Immune Cells                         | 3.41                 | IL36G,HLA-B,CCL3L1/CCL3L3,IL1B,CD8A                                     |
| Atherosclerosis Signaling                                                      | 2.83                 | CCR3,IL36G,MMP3,IL1B,S100A8                                             |
| Dendritic Cell Maturation                                                      | 2.13                 | STAT4,IL36G,HLA-B,LTB,IL1B                                              |
| Aryl Hydrocarbon Receptor Signaling                                            | 1.76                 | GSTM3,ALDH1A2,NQO1,IL1B                                                 |
| LPS/IL-1 Mediated Inhibition of RXR Function                                   | 1.74                 | IL36G,GSTM3,ALDH1A2,IL1B,SMOX                                           |
| <b>Other</b>                                                                   |                      |                                                                         |
| LXR/RXR Activation                                                             | 2.77                 | IL36G,IL1B,S100A8,PTGS2,NOS2                                            |
| Retinoate Biosynthesis I                                                       | 2.73                 | SDR16C5,ALDH1A2,RBP2                                                    |
| Cholecystokinin/Gastrin-mediated Signaling                                     | 2.23                 | IL36G,IL1B,EPHA4,PTGS2                                                  |
| Xenobiotic Metabolism Signaling                                                | 1.85                 | GSTM3,ALDH1A2,NQO1,IL1B,SMOX,NOS2                                       |

Details of the IPA pathways shown in Fig 6A for the 181 genes where “the fold change in CCR2<sup>-/-</sup> mice” divided by “the fold change in WT mice” was >1.5; i.e. pathways associated with genes more induced in CCR2<sup>-/-</sup> feet. <sup>a</sup>Same genes as in “Granulocyte Adhesion and Diapedesis”. Only pathways with (i) a -log(p value) > 1.5 and (ii) 4 or more molecules are shown

**Table S4. Details of the IPA pathways shown in Fig 6A (bottom graph)**

| Ingenuity Canonical Pathways                                                 | <b>-log(p value)</b> | <b>Molecules</b>                                                                                                                                                                                                                         |
|------------------------------------------------------------------------------|----------------------|------------------------------------------------------------------------------------------------------------------------------------------------------------------------------------------------------------------------------------------|
| <b>Monocyte/macrophage</b>                                                   |                      |                                                                                                                                                                                                                                          |
| Dendritic Cell Maturation                                                    | 12.4                 | PLCB2, LEP, NFKBIE, PIK3R5, HLA-DQA1, HLA-DRB1, HLA-DMB, CD83, HLADQB1, FCGR2B, TREM2, FCGR1A, PIK3CG, COL10A1, TNFRSF1B, FCGR3A, HLA-DMA, TYROBP, IL10, MYD88, HLA-B, IL15, CD40, PLCG2, PIK3R6, FCER1G, CD86, STAT2, PIK3CD, IRF8, TNF |
| Fcγ Receptor-mediated Phagocytosis in Macrophages and Monocytes              | 7.87                 | RAC2, PXN, TLN1, FYB, FCGR1A, INPP5D, PLD4, NCF1, PIK3CG, SYK, LYN, HCK, VAV1, FGR, FCGR3A, ACTA1, LCP2, PRKCB                                                                                                                           |
| Production of Nitric Oxide and Reactive Oxygen Species in Macrophages        | 7.74                 | PTPN6, PPP1R3C, NFKBIE, PIK3R5, PPP1R3A, APOC2, NCF4, SPI1, IRF1, NCF1, ALB, RHOG, PLCG2, PIK3CG, CYBA, NCF2, PIK3R6, CYBB, PIK3CD, SERPINA1, IRF8, TNFRSF1B, TNF, SIRPA, PRKCB                                                          |
| MSP-ROn Signaling Pathway                                                    | 6.24                 | CSF2RB, ITGB2, ITGAM, CCL12, PIK3CG, PIK3R6, PIK3R5, PIK3CD, CCR2, TNF, ACTA1                                                                                                                                                            |
| IL-12 Signaling and Production in Macrophages                                | 4.36                 | IL10, MYD88, PIK3R5, APOC2, SPI1, IRF1, ALB, CD40, TGFB1, PIK3CG, PIK3R6, SERPINA1, PIK3CD, IRF8, TNF, PRKCB                                                                                                                             |
| <b>Pattern recognition</b>                                                   |                      |                                                                                                                                                                                                                                          |
| Role of Pattern Recognition Receptors in Recognition of Bacteria and Viruses | 8.01                 | Tlr11, NLRP3, IL10, MYD88, PIK3R5, C1QC, C1QA, C1QB, IRF7, PLCG2, PIK3CG, SYK, TLR1, PIK3R6, PIK3CD, TNF, C3AR1, PRKCB                                                                                                                   |
| <b>Autoimmunity</b>                                                          |                      |                                                                                                                                                                                                                                          |
| Altered T Cell and B Cell Signaling in Rheumatoid Arthritis                  | 7.96                 | HLA-DMA, Tlr11, CD79B, IL10, IL15, HLA-DQA1, HLA-DRB1, HLA-DMB, HLADQB1, CD79A, CD40, TGFB1, TLR1, FCER1G, CD86, Tlr13, TNF                                                                                                              |
| Type I Diabetes Mellitus Signaling                                           | 7.88                 | HLA-DMA, SOCS3, CASP3, MYD88, NFKBIE, HLA-B, HLA-DQA1, APAF1, HLA-DRB1, HLA-DMB, HLA-DQB1, IRF1, PRF1, FCER1G, CD86, BID, TNFRSF1B, HLA-F, TNF                                                                                           |
| Autoimmune Thyroid Disease Signaling                                         | 6.88                 | HLA-DMA, PRF1, CD40, IL10, HLA-B, HLA-DQA1, FCER1G, HLA-DRB1, CD86, HLA-DMB, HLA-DQB1, HLA-F                                                                                                                                             |
| Systemic Lupus Erythematosus Signaling                                       | 4.07                 | PTPN6, CD79B, IL10, HLA-B, PIK3R5, FCGR2B, FCGR1A, CD79A, INPP5D, CD40, PIK3CG, CD72, PLCG2, PIK3R6, FCER1G, LYN, CD86, PIK3CD, HLA-F, TNF, FCGR3A                                                                                       |
| <b>B and T cells</b>                                                         |                      |                                                                                                                                                                                                                                          |
| Role of NFAT in Regulation of the Immune Response                            | 9.55                 | PLCB2, NFKBIE, PIK3R5, HLA-DQA1, HLA-DRB1, HLA-DMB, HLA-DQB1, FCGR2B, FCGR1A, CD79A, GNB4, PIK3CG, FCGR3A, HLA-DMA, CD79B, ITPR1, GNAI2, BTK, SYK, PLCG2, PIK3R6, FCER1G, LYN, CD86, MEF2C, PIK3CD, LCP2                                 |
| T Helper Cell Differentiation                                                | 8.5                  | HLA-DMA, IL2RG, IL10, HLA-DQA1, HLA-DRB1, HLA-DMB, HLA-DQB1, CD40, TGFB1, FCER1G, IL10RB, IL10RA, CD86, IL2RA, TNFRSF1B, TNF                                                                                                             |
| FcγRIIB Signaling in B Lymphocytes                                           | 8.36                 | BTK, CD79B, SYK, PIK3CG, PLCG2, LYN, PIK3R6, PIK3R5, PIK3CD, DOK1, FCGR2B, CD79A, INPP5D                                                                                                                                                 |
| iCOS-iCOSL Signaling in T Helper Cells                                       | 7.68                 | HLA-DMA, IL2RG, NFKBIE, CSK, HLA-DQA1, PIK3R5, HLA-DRB1, HLA-DMB, HLA-DQB1, ITPR1, INPP5D, CD40, PIK3CG, PIK3R6, FCER1G, VAV1, IL2RA, PIK3CD, LCP2                                                                                       |
| Antigen Presentation Pathway                                                 | 7.3                  | PSMB9, NLR5, HLA-DMA, HLA-B, HLA-DQA1, CIITA, HLA-DRB1, HLA-DMB, CD74, HLA-F, TAP1                                                                                                                                                       |
| B Cell Receptor Signaling                                                    | 6.87                 | RAC2, PTPN6, CD79B, POU2F2, NFKBIE, CSK, PIK3R5, FCGR2B, CD79A, INPP5D, BTK, SYNJ1, DAPP1, SYK, PIK3CG, PLCG2, PIK3R6, LYN, VAV1, PIK3AP1, PIK3CD, PRKCB                                                                                 |
| PI3K Signaling in B Lymphocytes                                              | 6.45                 | PLCB2, CD79B, NFKBIE, ITPR1, FCGR2B, INPP5D, CD79A, BTK, DAPP1, CD40, CD180, SYK, PIK3CG, PLCG2, LYN, VAV1, PIK3AP1, PIK3CD, PRKCB                                                                                                       |
| CD28 Signaling in T Helper Cells                                             | 6.41                 | HLA-DMA, PTPN6, NFKBIE, CSK, HLA-DQA1, PIK3R5, HLA-DRB1, HLA-DMB, HLA-DQB1, ITPR1, PIK3CG, SYK, PIK3R6, FCER1G, CD86, VAV1, PIK3CD, LCP2                                                                                                 |
| Graft-versus-Host Disease Signaling                                          | 6.14                 | HLA-DMA, PRF1, HLA-B, HLA-DQA1, FCER1G, HLA-DRB1, CD86, HLA-DMB, HLA-DQB1, HLA-F, TNF                                                                                                                                                    |
| Tec Kinase Signaling                                                         | 5.86                 | PIK3R5, ITGA5, BTK, GNAI2, GNB4, RHOG, PLCG2, PIK3CG, LYN, FCER1G, PIK3R6, HCK, VAV1, STAT2, PIK3CD, TNF, FGR, ACTA1, ITGA4, PRKCB                                                                                                       |
| B Cell Development                                                           | 5.85                 | HLA-DMA, CD79B, CD40, HLA-DQA1, HLA-DRB1, CD86, HLA-DMB, HLA-DQB1, CD79A                                                                                                                                                                 |
| Allograft Rejection Signaling                                                | 5.72                 | HLA-DMA, PRF1, H2-T24, CD40, IL10, HLA-B, FCER1G, HLA-DQA1, CD86, HLA-DRB1, HLA-DMB, HLA-DQB1, HLA-F, TNF                                                                                                                                |
| IL-4 Signaling                                                               | 5.49                 | HLA-DMA, IL2RG, PTPN6, HLA-DQA1, PIK3R5, HLA-DRB1, HLA-DMB, HLA-DQB1, INPP5D, SYNJ1, PIK3CG, PIK3R6, PIK3CD                                                                                                                              |
| CTLA4 Signaling in Cytotoxic T Lymphocytes                                   | 5.24                 | HLA-DMA, PTPN6, HLA-DQA1, PIK3R5, HLA-DRB1, HLA-DMB, HLA-DQB1, PIK3CG, SYK, PIK3R6, FCER1G, CD86, PIK3CD, LCP2                                                                                                                           |

|                                                            |      |                                                                                                                                                                     |
|------------------------------------------------------------|------|---------------------------------------------------------------------------------------------------------------------------------------------------------------------|
| Cytotoxic T Lymphocyte-mediated Apoptosis of Target Cells  | 5.17 | HLA-DMA,PRF1,H2-T24,CASP3,HLA-B,FCER1G,APAF1,HLA-DQA1,BID,HLA-DRB1,HLA-DMB,HLA-DQB1,HLA-F                                                                           |
| PKC $\theta$ Signaling in T Lymphocytes                    | 5.13 | HLA-DMA,RAC2,NFKBIE,HLA-DQA1,PIK3R5,HLA-DRB1,HLA-DMB,HLA-DQB1,PLCG2,PIK3CG,PIK3R6,FCER1G,CD86,VAV1,PIK3CD,LCP2                                                      |
| Communication between Innate and Adaptive Immune Cells     | 4.61 | Tlr11,CD40,IL10,TLR1,IL15,HLA-B,FCER1G,CD86,Tlr13,HLA-DRB1,CD83,HLA-F,TNF                                                                                           |
| <b>NK cells</b>                                            |      |                                                                                                                                                                     |
| Natural Killer Cell Signaling                              | 9.02 | RAC2,PTPN6,Klra4 (includes others),LAIR1,TYROBP,PIK3R5,SH3BP2,INPP5D,SYNJ1,SYK,KLRC4-KLRK1/KLRK1,PLCG2,PIK3CG,PIK3R6,FCER1G,VAV1,PIK3CD,SH2D1B,LCP2,FCGR3A,PRKCB    |
| Crosstalk between Dendritic Cells and Natural Killer Cells | 8.4  | IL2RG,TYROBP,CD69,IL15,HLA-B,HLA-DRB1,TLN1,CD83,TREM2,CSF2RB,PRF1,CD40,KLRC4-KLRK1/KLRK1,CD86,TNFRSF1B,HLA-F,TNF,ACTA1                                              |
| <b>Muscle</b>                                              |      |                                                                                                                                                                     |
| Actin Cytoskeleton Signaling                               | 4.79 | RAC2,PXN,MYLPP,CSK,ACTN2,PIK3R5,ITGA5,MYH7,TLN1,IQGAP2,MYH2,PIK3CG,PIK3R6,MYH3,VAV1,PIK3CD,NCKAP1L,TMSB10/TMSB4X,PIP4K2A,ACTA1,MYH1,ITGA4                           |
| Calcium Signaling                                          | 4.74 | RAP2B,TNNT1,CHRNA1,ATP2B1,TNNC2,TNNC1,TNNT2,TRDN,CHRN1,Tpm1,MYH7,ITPR1,MYH2,MYH3,RYR1,MEF2C,TNNI1,SLC8A1,ACTA1,MYH1                                                 |
| Paxillin Signaling                                         | 4.76 | ITGB2,PXN,ITGAM,PIK3CG,ACTN2,CSK,PIK3R6,PIK3R5,ITGA5,PIK3CD,TLN1,ITGA7,ACTA1,ITGA4                                                                                  |
| <b>Inflammation</b>                                        |      |                                                                                                                                                                     |
| TREM1 Signaling                                            | 9.57 | Tlr11,TYROBP,IL10,MYD88,LAT2,ITGA5,CD83,FCGR2B,CD40,CCL12,CCL7,PLCG2,TLR1,CD86,Tlr13,TNF                                                                            |
| Leukocyte Extravasation Signaling                          | 8.81 | RAC2,MMP14,PIK3R5,MMP25,PIK3CG,CYBA,CYBB,ACTA1,ITGA4,PXN,CXCR4,ACTN2,ARHGAP4,ITGA5,NCF4,SELPLG,GNAI2,BTK,ITGB2,NCF1,WIPF1,ITGAM,PLCG2,NCF2,PIK3R6,VAV1,PIK3CD,PRKCB |
| Atherosclerosis Signaling                                  | 6.36 | ALOX12B,MSR1,CXCR4,APOC2,PLA2G7,F3,TNFRSF14,SELPLG,ITGB2,ALB,CD40,CCL12,TGFB1,COL10A1,SERPINA1,CCR2,TNF,ITGA4                                                       |
| Fc Epsilon RI Signaling                                    | 5.38 | RAC2,PIK3R5,INPP5D,BTK,SYNJ1,PLCG2,PIK3CG,SYK,LYN,FCER1G,PIK3R6,VAV1,PIK3CD,TNF,LCP2,PRKCB                                                                          |
| Integrin Signaling                                         | 4.96 | RAP2B,RAC2,PXN,ARHGAP26,ACTN2,PIK3R5,ITGA5,TLN1,PARVB,ITGB2,WIPF1,RHOG,ITGAM,PIK3CG,PLCG2,PIK3R6,ZYX,PIK3CD,ITGA7,ACTA1,ITGA4                                       |
| Role of JAK1 and JAK3 in $\gamma$ c Cytokine Signaling     | 4.13 | SOCS3,IL2RG,FES,PIK3CG,SYK,IL15,PIK3R6,PIK3R5,IL2RA,PIK3CD                                                                                                          |
| NF- $\kappa$ B Activation by Viruses                       | 4.09 | ITGB2,CCR5,PIK3CG,NFKBIE,PIK3R6,PIK3R5,ITGA5,PIK3CD,TNFRSF14,ITGA4,PRKCB                                                                                            |
| <b>Other</b>                                               |      |                                                                                                                                                                     |
| Virus Entry via Endocytic Pathways                         | 4.4  | RAC2,HLA-B,PIK3R5,ITGA5,ITGB2,FLNC,PLCG2,PIK3CG,PIK3R6,PIK3CD,ACTA1,PRKCB,ITGA4                                                                                     |
| Induction of Apoptosis by HIV1                             | 4.32 | CASP3,CXCR4,NFKBIE,APAF1,BID,BAX,TNFRSF1B,NAIP,TNF,BAK1                                                                                                             |
| LXR/RXR Activation                                         | 4.26 | TTR,MSR1,VTN,AHSG,NR1H3,APOC2,ABCG1,ALB,CCL12,CCL7,SERPINA1,PLTP,GC,TNFRSF1B,TNF                                                                                    |
| Role of Tissue Factor in Cancer                            | 4.21 | F10,ARRB2,CASP3,PIK3CG,LYN,HCK,PIK3R6,PIK3R5,PLAUR,FGB,PIK3CD,RPS6KA2,F3,FGR                                                                                        |
| ILK Signaling                                              | 4.2  | PXN,FBLIM1,CASP3,ACTN2,PIK3R5,MYH7,PARVB,ITGB2,RHOG,MYH2,FLNC,PIK3CG,PIK3R6,MYH3,PIK3CD,TMSB10/TMSB4X,TNF,ACTA1,MYH1                                                |
| Phospholipase C Signaling                                  | 4.1  | PLCB2,CD79B,MYLPP,ITGA5,ITPR1,FCGR2B,CD79A,BTK,PLD4,TGM2,GNB4,RHOG,SYK,PLCG2,FCER1G,LYN,MEF2C,ARHGEF2,ADCY7,LCP2,ITGA4,PRKCB                                        |

Details of the IPA pathways shown in Fig 6A for the 920 gene where “the fold change in WT mice” divided by “the fold change in CCR2<sup>-/-</sup> mice” was >1.5; i.e. pathways associated with the genes less induced in CCR2<sup>-/-</sup> feet. Only pathways with a  $-\log(p \text{ value}) > 4$  are shown.



**Table S5. Ingenuity upstream regulator analysis of the 181 gene more induced in CCR2<sup>-/-</sup> mice**

| Upstream Regulator | Activation z-score | p-value of overlap | Target molecules in dataset                                                                                                                                |
|--------------------|--------------------|--------------------|------------------------------------------------------------------------------------------------------------------------------------------------------------|
| STAT3              | 1.774              | 4.29E-14           | ADM,ALAS2,ANGPTL4,CCL20,CHI3L1,CXCL13,CXCR2,HLA-B,HP,Ifi204 (includes others),IFIT1,IFIT1B,IFITM1,IL1B,MMP3,NOS2,PTGS2,SERPINA3,SERPINB1,SERPINB3,SERPINB4 |
| MKL2               | -2.646             | 3.16E-13           | CXCL6,ELANE,HLA-B,IFITM1,LCN2,LTF,Ngp,PGLYRP1,PPBP,S100A8,S100A9,SERPINB10                                                                                 |
| MKL1               | -2.646             | 3.52E-12           | CXCL6,ELANE,HLA-B,IFITM1,LCN2,LTF,Ngp,PGLYRP1,PPBP,S100A8,S100A9,SERPINB10                                                                                 |
| RELB               | 0.097              | 1.01E-10           | CCL19,CCL20,CCR3,CXCL13,IL1B,LTB,NOS2,PTGS2,STAT4                                                                                                          |
| NFKBIA             | 2.068              | 2.78E-10           | CCL20,CCL3L1/CCL3L3,CCR3,CXCL3,CXCL6,CYP7B1,HLA-B,Ifi204 (includes others),IFIT1B,IL1B,LCN2,MMP3,NOS2,PTGS2,PTX3,S100A8,S100A9,TFRC                        |
| STAT1              | 1.526              | 6.64E-10           | ALAS2,CCL19,CCRL2,Ifi204 (includes others),IFIT1,IFIT1B,IFITM1,IL1B,NOS2,PTGS2,Retnla,SERPINA3,SERPINB3,SERPINB4                                           |
| RELA               | 2.748              | 3.70E-09           | CCL19,CCL20,CHI3L1,CXCL3,CXCL6,CYP17A1,EHF,HLA-B,IFIT1B,IL1B,LTB,NOS2,PTGS2,PTX3,TREM1                                                                     |
| CEBPE              | 2.199              | 3.01E-08           | ELANE,LCN2,LTF,Ngp,PTGS2,Retnla,RETNLB                                                                                                                     |
| NFKB1              | 2.062              | 1.29E-07           | CCL19,CCL20,CCL3L1/CCL3L3,CXCL3,EHF,IFIT1B,IL1B,LTB,NOS2,PTGS2,PTX3                                                                                        |
| HMGB1              | 2.543              | 1.31E-07           | CCL20,CXCL3,IFIT1,IL1B,MMP3,NOS2,PTGS2                                                                                                                     |

## COLOUR CODING

|  |                                                                                                                                           |
|--|-------------------------------------------------------------------------------------------------------------------------------------------|
|  | <b>Muscle and vasculature associated upstream regulators</b><br>(Note these have negative activation z scores suggesting down regulation) |
|  | <b>NF-κB associated upstream regulators (often associated with inflammation)</b>                                                          |
|  | <b>Interferon associated upstream regulators</b>                                                                                          |
|  | <b>Transcription factor associated with granulocyte differentiation</b><br>(Lekstrom-Himes, 2001. Stem Cells. 19(2):125-33)               |
|  | <b>Inflammatory mediator associated with RA</b><br>(Chen et al. 2013. Rheumatology (Oxford). 2013 Apr 12. [Epub ahead of print])          |

Ingenuity upstream regulator analysis of the 181 genes where “the fold change in CCR2<sup>-/-</sup> mice” divided by “the fold change in WT mice” was >1.5; i.e. upstream regulators more active in CCR2<sup>-/-</sup> mice. Activation z scores and significance (p values) are shown for upstream regulators where p<1.4E-7 (Direct only). Upstream regulators are colour coded according to the legend (COLOUR CODING). Note chemokine ligands and receptors are well represented in “Target molecules in dataset”.

**Table S6. Ingenuity upstream regulator analysis of the 920 genes less induced in CCR2<sup>-/-</sup> mice**

| Upstream Regulator | Activation z-score | p-value of overlap | Target molecules in dataset                                                                                                                                                                                                                                                                                                           |
|--------------------|--------------------|--------------------|---------------------------------------------------------------------------------------------------------------------------------------------------------------------------------------------------------------------------------------------------------------------------------------------------------------------------------------|
| STAT1              | 5.849              | 1.40E-19           | APOBEC3B,APOC2,BATF2,BAX,BCL2L11,CASP3,CCL12,CD274,CD40,CD86,CH25H,Chi3l3/Chi3l4,CIITA,CYP2E1,FAM26F,FCER1G,FCGR1A,FGL2,GBP1,GBP5,Gbp6 (includes others),HLA-DRB1,Ifi204 (includes others),Ifi47,IFIT2,IL10,IL15,IRF1,IRF5,IRF7,IRF8,IRGM,KLRC4-KLRK1/KLRK1,Neur13,PRF1,PSMB10,PSMB9,Rnf213,Sifn1,SLFN13,Sifn2,SOCS3,SP110,STAT2,TAP1 |
| SPI1               | 3.547              | 1.45E-19           | BAX,C1QC,CD180,CD68,CD72,CD79A,CD79B,CIITA,CSF1R,CSF2RB,CTSS,CYBB,EMR1,FCER1G,FCGR2B,FES,HK3,IL10,IL2RA,ITGA4,ITGA5,ITGAM,ITGB2,Klra4 (includes others),Lyz1/Lyz2,MEF2C,NCF1,NCF2,NCF4,P2RY10,PIK3CG,PTPN6,SPI1,TFEC,TNF,TNFRSF14,VAV1                                                                                                |
| MYOD1              | 3.654              | 2.42E-13           | ACTA1,ADCY7,ASS1,BIN1,CKM,CRYAB,DES,ENO3,GMFG,Ifi204 (includes others),ITGA7,MEF2C,MUSK,MYF6,MYH3,MYH7,MYLPF,MYOD1,PFKM,PLEKHO1,PS6KA2,RYR1,SCN4A,SGCA,SLC2A4,TGFB1,TNNC1,TNNC2,TNNI1,TNNT1,TNNT2                                                                                                                                     |
| IRF8 <sup>a</sup>  | 2.854              | 1.25E-12           | ASAH1,BAX,CASP3,CCR2,CD40,CD83,CD86,CIITA,CSF1R,CTSS,CXCL16,CYBB,EMR1,GBP1,IFIT2,IL15,IRF8,ITGAM,MSR1,PRDM1,TNF,TYROBP                                                                                                                                                                                                                |
| IRF3               | 5.077              | 1.63E-12           | APOBEC3B,BC147527,CCL12,CD69,CD86,DHX58,FAM26F,FCGR1A,GBP1,GBP5,HLA-A-F,Ifi204 (includes others),Ifi47,IFIT2,IL15,IRF5,IRF7,IRGM,Irgm2,NRAP,PARP14,PLAC8,PLAG1,PLCG2,Sifn1,STAT2,TAP1,TNF                                                                                                                                             |
| IRF7               | 5.210              | 7.19E-12           | BC147527,CD40,CD69,DHX58,FAM26F,FCGR1A,GBP1,GBP4,GBP5,Ifi204 (includes others),Ifi47,IFIT2,IL15,IRF1,IRF7,IRF8,IRGM,Irgm2,ITGAM,NRAP,PARP14,PLAC8,PLSCR1,PSMB10,PSMB9,Sifn1,STAT2,TAP1                                                                                                                                                |
| STAT3              | 4.296              | 8.59E-12           | ADIPOQ,AHSG,BAK1,BCL2L11,CCL12,CCR5,CD40,CD74,CIITA,FCER1G,FCGR1A,FGFB,HLA-B,HLA-DMA,HLA-DQA1,HLA-DRB1,Ifi204 (includes others),IFI30,IL10,IL2RA,IRF1,IRF7,ITGAM,ITGB2,Lyz1/Lyz2,MYD88,MYH7,PLAUR,PLSCR1,PRDM1,PSMB9,PTPN6,Sifn1,SLFN13,Sifn2,SOCS3,SP110,TAP1,TGFB1,TNF,TNFRSF1B,Tnfsf9,TRIM14,ZFP36                                 |
| MEF2C              | 2.722              | 1.32E-11           | ABRA,ACTA1,CKB,CKM,CPT1B,DES,MEF2C,MYH1,MYH7,MYOD1,MYOT,MYOZ1,SLC2A4,SLC8A1,SMYD1,TNNC1,TNNI1,TNNT2                                                                                                                                                                                                                                   |
| IRF1               | 3.641              | 3.56E-11           | ADAM8,BAK1,BAX,CASP3,CCL12,CD40,CIITA,CTSS,CXCL16,CYBB,FGL2,IFIT2,IL10,IL15,IL18BP,IRF1,IRF5,IRF7,PSMB10,PSMB9,SPI1,STAT2,TAP1,TGFB1,TNF                                                                                                                                                                                              |

### COLOUR CODING

|  |                                                       |
|--|-------------------------------------------------------|
|  | Interferon associated upstream regulators             |
|  | Myeloid cell development                              |
|  | Muscle and vasculature associated upstream regulators |

Ingenuity upstream regulator analysis of the 920 genes where “the fold change in WT mice” divided by “the fold change in CCR2<sup>-/-</sup> mice” was >1.5; i.e. upstream regulators less active in CCR2<sup>-/-</sup> feet. Activation z scores and significance (p values) are shown for upstream regulators where p<1E-10 (Direct only). Upstream regulators are colour coded according to the legend (COLOUR CODING). <sup>a</sup>IRF8 is involved in myeloid differentiation into monocytes and is less strongly expressed in neutrophils, with IRF8 deficiency shown to cause major neutrophil infiltration (Rocca et al., 2013. Plos One 8(5): e62751).
